# Supplementary material
Source: publisher figshare collection journal article supplement (https://frontiersin.figshare.com/ndownloader/files/16753775)
Supplement: Supplementary file 1 [file 16753775]

**SUPPLEMENTARY DATA**

List of temporal durations of species of North American Equinae. Temporal duration is in million years (m. y.) and derived from the temporally calibrated cladogram of the Equinae in Maguire and Stigall (2008: fig. 1, p. 176).

| **Taxon** | **Temporal duration**  **(m. y.)** |
| --- | --- |
| **Merychippines** |  |
| *“Merychippus” gunteri* | 5.0 |
| *“M.” primus* | 1.2 |
| *“M.” sejunctus* | 2.8 |
| *“M.” intermontanus* | 3.0 |
| *“M.” coloradensis* | 4.0 |
| *“M.” republicanus* | 1.0 |
| *“M.” goorisi* | 0.7 |
| **Hipparionines** |  |
| *Merychippus californicus* | 1.6 |
| *M. insignis*  *M. brevidontus* | 4.5  3.1 |
| *Neohipparion affine* | 2.8 |
| *N. trampasense* | 4.1 |
| *N. leptode* | 1.8 |
| *N. eurystyle* | 3.5 |
| *N. gidleyi* | 1.2 |
| *Pseudhipparion retrusum* | 1.3 |
| *P. curtivallum* | 1.2 |
| *P. hessei* | 1.0 |
| *P. gratum*  *P. skinneri*  *P. simpsoni* | 1.7  3.4  0.6 |
| *Hipparion tehonense* | 5.5 |
| *H. forcei* | 3.8 |
| *H. shirleyae* | 2.0 |
| *Nannipus aztecus* | 2.7 |
| *N. peninsulatus* | 3.4 |
| *N. beckensis* | 0.4 |
| *N. lenticularis* | 2.7 |
| *N. morgani* | 1.0 |
| *N. westoni* | 2.3 |
| *Cormohipparion occidentale* | 7.0 |
| *C. quinni* | 1.0 |
| *C. sphenodus* | 3.4 |
| *C. plicatile* | 6.8 |
| *C. ingenuum* | 6.0 |
| *C. emsliei* | 4.5 |

Continued

| **Taxon** | **Temporal duration**  **(m. y.)** |
| --- | --- |
| **Protohippines** |  |
| *Calippus circulus* | 1.5 |
| *C. martini* | 2.4 |
| *C. cerasinus* | 0.4 |
| *C. maccartyi* | 1.0 |
| *C. hondurensis* | 1.1 |
| *C. placidus* | 2.6 |
| *C. proplacidus* | 1.1 |
| *C. elachistus* | 3.5 |
| *C. regulus* | 3.3 |
| *Protohippus vetus* | 2.0 |
| *P. perditus* | 1.6 |
| *P. supremus* | 3.0 |
| *P. gidleyi* | 3.4 |
| **Equines** |  |
| *Acritohippus tertius* | 1.4 |
| *A. isonesus* | 2.3 |
| *A. quinni* | 2.3 |
| *A. stylodontus* | 1.8 |
| *Parapliohippus carrizoensis* | 2.2 |
| *Pliohippus mirabilis* | 1.5 |
| *P. fossulatus* | 2.4 |
| *P. pernix* | 2.4 |
| *P. nobilis* | 1.8 |
| *P. tantalus* | 2.4 |
| *Heteropliohippus hulberti* | 2.3 |
| *“Pliohippus” tehonensis* | 1.0 |
| *Astrohippus ansae* | 5.2 |
| *Astrohippus stockii* | 5.2 |
| *“Dinohippus” leardi* | 2.7 |
| *“D.” interpolatus* | 3.4 |
| *“D.” mexicanus* | 0.7 |
| *Dinohippus leidyanus* | 3.4 |
| *Onohippidium* sp. | 2.7 |
| *Boreohippidion galushai* | 2.1 |
| *Equus simplicidens* | 1.0 |
